# Supplementary material
Source: publisher figshare collection journal article supplement (https://frontiersin.figshare.com/ndownloader/files/25499402)
Supplement: Supplementary file 1 [file 25499402]

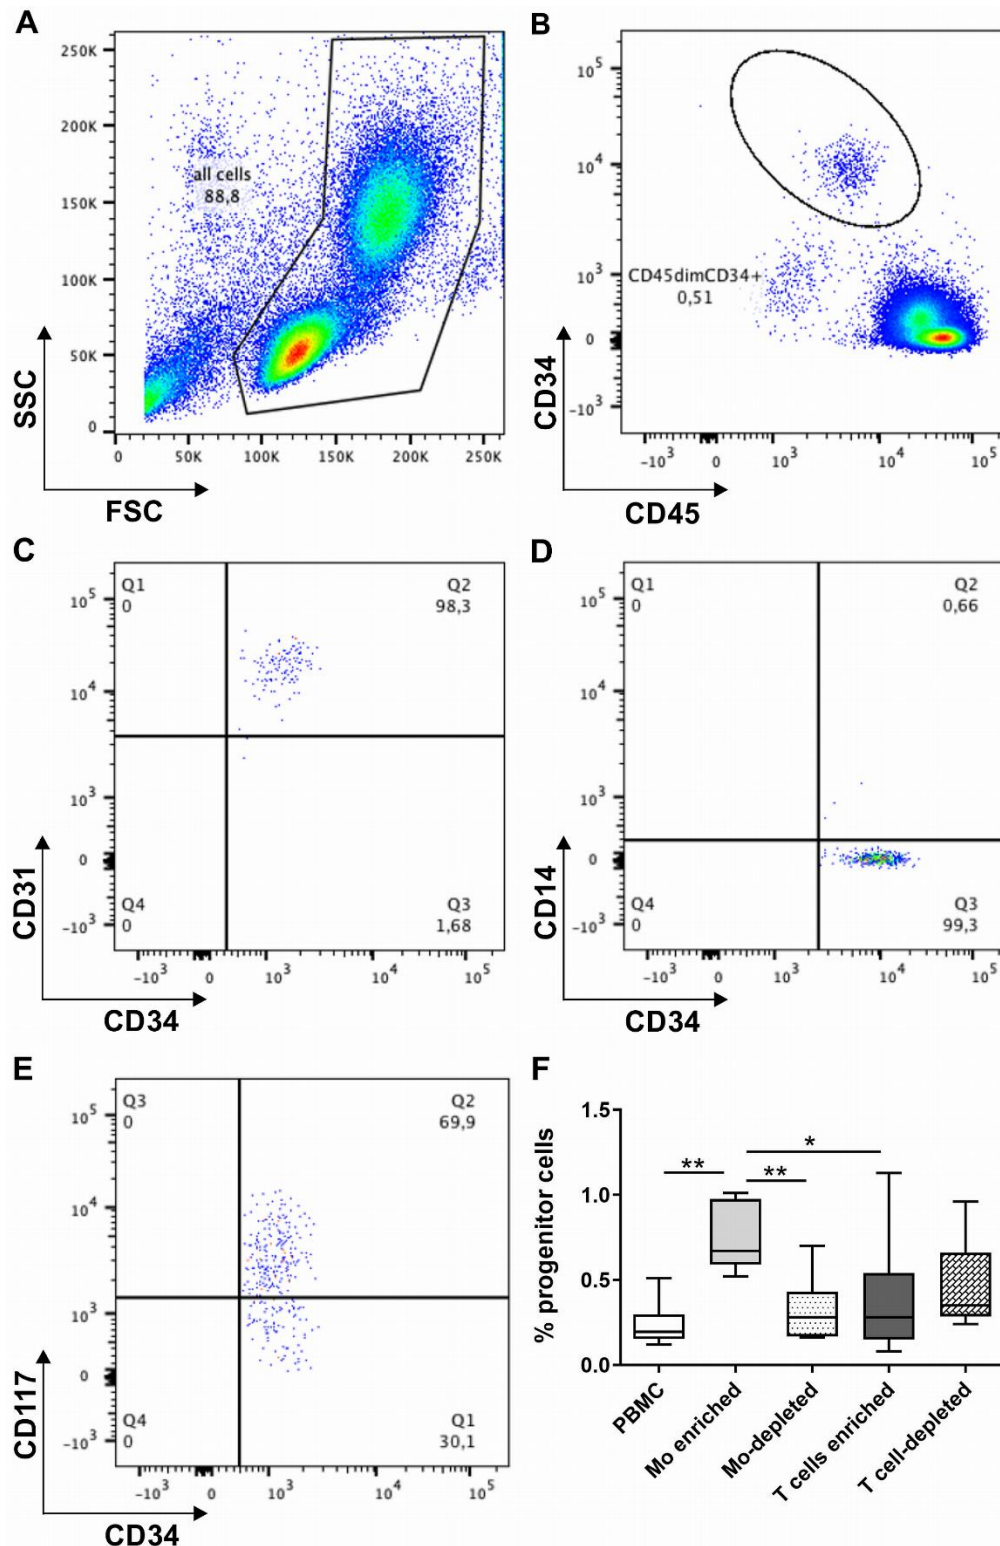

**Supplemental Figure 1. Peripheral blood obtained from LRS chambers contains mononuclear cells with progenitor phenotype.** Flow cytometry analyses of PBMC isolated from LRS chambers. **(A)** Forward/Side Scatter. **(B)** CD34<sup>+</sup> cells show low-level expression of CD45. **(C)** CD34<sup>+</sup> cells co-express CD31. **(D)** CD34<sup>+</sup> cells do not express CD14. **(E)** Co-expression of CD117 by the majority of CD34<sup>+</sup> cells. **(F)** Percentage of CD34<sup>+</sup>CD31<sup>+</sup>CD45<sup>dim</sup>CD14<sup>-</sup> progenitor-type cells in immune cell fractions. The data are expressed as mean values±SD. \*p value ≤0.05, \*\* p value ≤0.01.
