# Supplementary material
Source: publisher figshare collection journal article supplement (https://frontiersin.figshare.com/ndownloader/files/25499402)
Supplement: Supplementary file 2 [file 25499402]

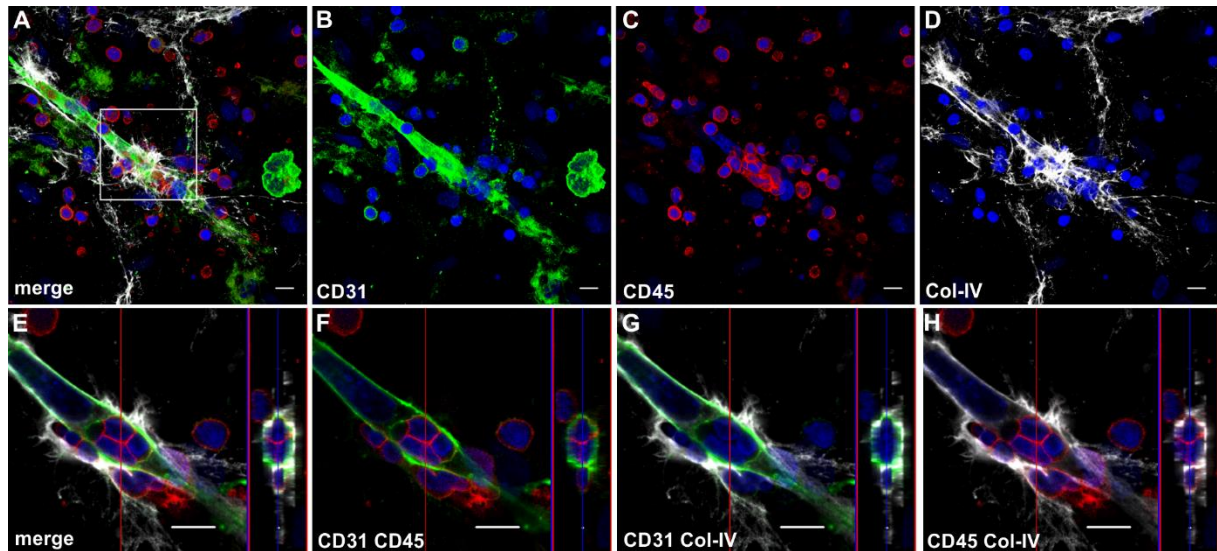

**Supplemental Figure 5. Neo-vessels develop in the absence of CD14<sup>+</sup> Mo.** Representative CLSM images of MSC co-cultured with Mo-depleted PBMC in 3D fibrin matrix on day 14 showing (B) a CD31<sup>+</sup> vascular structure associated with (C) numerous CD45<sup>+</sup> leukocytes. (D) Col-IV matrix is in alignment with the developing vessel. (A) Merge. (A-D) DAPI nuclear stain. Collapsed 13,5  $\mu\text{m}$ -z-stack consisting of 30 consecutive images. Scale bars, 10  $\mu\text{m}$ . (E-H) Orthoview CLSM images of collapsed z-stack shown in ((A), boxed area). The 2D cross-section images (frame 16/30) show (F) four CD45<sup>+</sup> leukocytes inside of a CD31-lined vacuole within the CD31<sup>+</sup> elongated cell-in-cell structure. Tightly associated with the cell-in-cell structure is a (G) Col-IV<sup>+</sup> matrix lining resembling a basement membrane. (H) Neighboring CD45<sup>+</sup> leukocytes immediately adjacent to the CD31<sup>+</sup> cell-in-cell structure are also surrounded by a Col-IV<sup>+</sup> matrix. (E) Merge. (E-H) Nuclei stained with DAPI. Scale bars, 10  $\mu\text{m}$ .
