# Supplementary material
Source: publisher figshare collection journal article supplement (https://frontiersin.figshare.com/ndownloader/files/25499402)
Supplement: Supplementary file 3 [file 25499402]

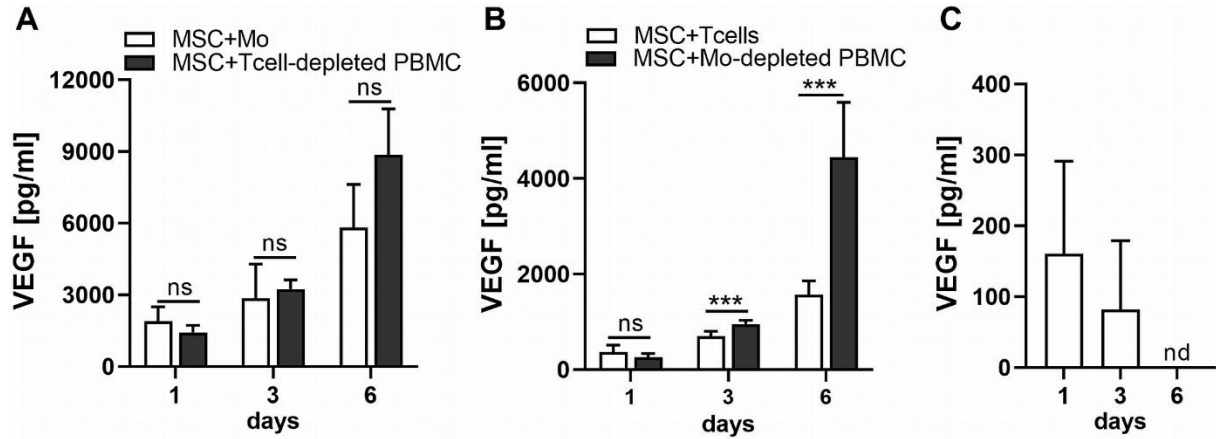

**Supplemental Figure 2.** (A) Determination of VEGF by ELISA in cell-free supernatants of MSC co-cultured with enriched Mo (n=4) and MSC co-cultured with T cell-depleted PBMC (n=4) in 3D fibrin matrix on day 1, day 3 and day 6, respectively. The data are expressed as mean values $\pm$ SD. ns=not significant. (B) Determination of VEGF by ELISA in cell-free supernatants of MSC co-cultured with enriched T cells (n=6) and MSC co-cultured with Mo-depleted PBMC (n=6) in 3D fibrin matrix on day 1, day 3 and day 6, respectively. The data are expressed as mean values $\pm$ SD. ns=not significant, \*\*\*p value  $\leq$ 0.001. (C) Determination of VEGF by ELISA in cell-free supernatants of enriched Mo (n=3) without stromal support in 3D fibrin matrix on day 1, day 3 and day 6, respectively. nd=not detected.
