# Supplementary material
Source: publisher figshare collection journal article supplement (https://frontiersin.figshare.com/ndownloader/files/25499402)
Supplement: Supplementary file 4 [file 25499402]

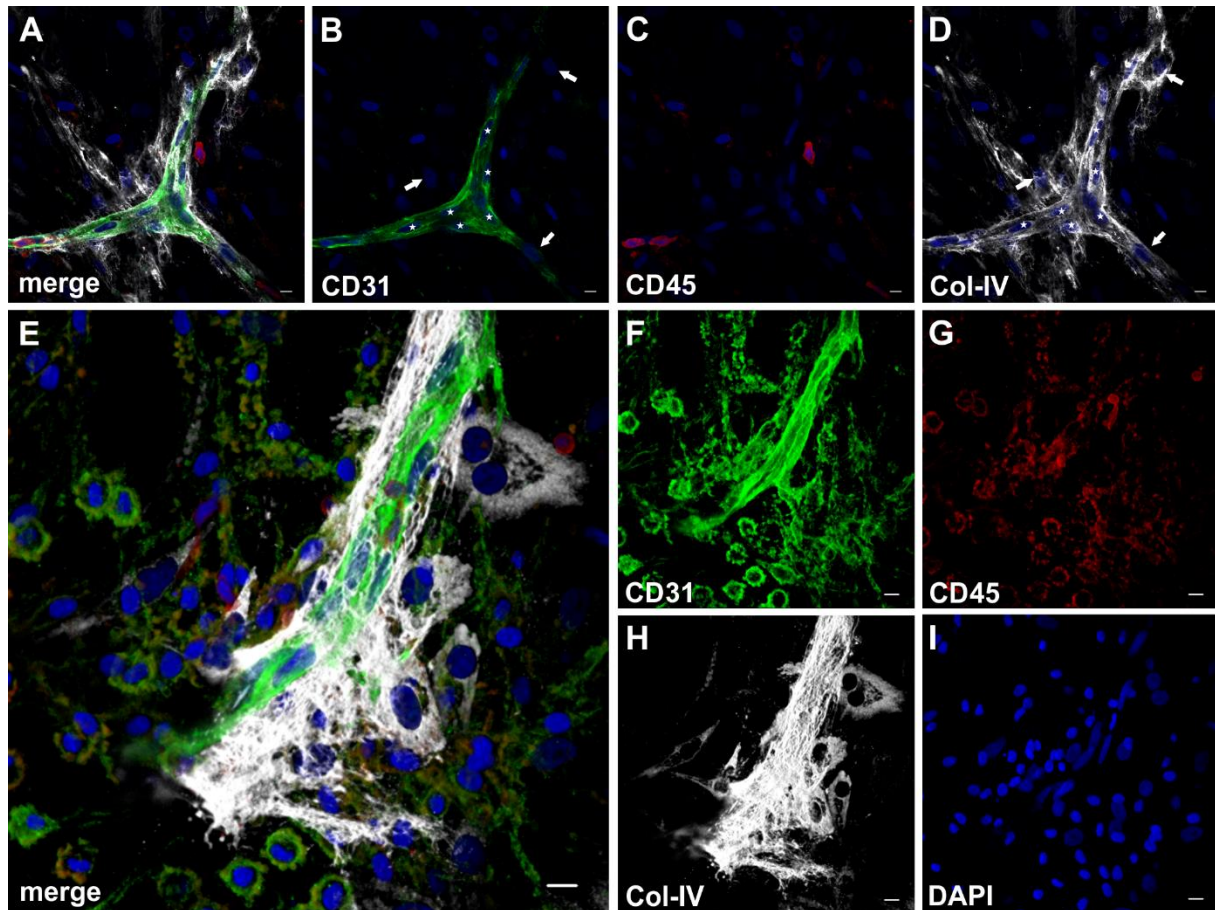

**Supplemental Figure 4. Neo-vessels formed in co-cultures of MSC, enriched Mo and enriched T cells show similarities to vascular outgrowth from inflamed synovial tissue.** (A-D) 2D cross-section images (frame 25/45) of collapsed z-stack images shown in Figure 6 (A-E) demonstrating that (B) CD31<sup>+</sup> EC of developing vascular structure co-express (D) Col-IV (stars in (B) and (D)). Perivascular stromal cells do not express (B) CD31 (arrows), but are (D) Col-IV<sup>+</sup> (arrows). (C) CD45<sup>+</sup> leukocytes are associated with vascular structure. (A) Merge. (A-D) Nuclei stained with DAPI. Scale bars, 10  $\mu$ m. (E-I) Vascular outgrowth originating from inflamed synovial tissue fragment obtained from a patient with osteoarthritis, cultured in 3D fibrin matrix for 20 days as described in a previous publication (Rüger et al., 2018). (F) The CD31<sup>+</sup> vascular sprout is surrounded by (H) Col-IV matrix and by Col-IV<sup>+</sup> stromal cells that show close contact with perivascular cells co-expressing (G) CD45 and (F) CD31 consistent with macrophages. (I) DAPI stain. (E) Merge. (E-I) Collapsed 28  $\mu$ m-z-stack consisting of 35 consecutive images. Scale bars, 10  $\mu$ m.
