# Supplementary material
Source: publisher figshare collection journal article supplement (https://frontiersin.figshare.com/ndownloader/files/25499402)
Supplement: Supplementary file 5 [file 25499402]

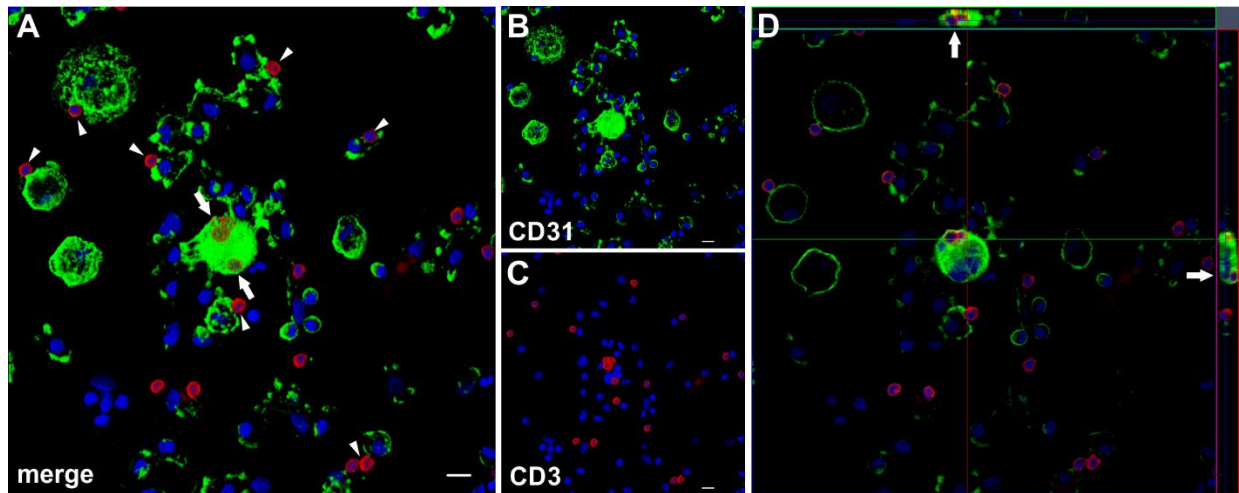

**Supplemental Figure 3. Formation of cell-in-cell structures during culture of whole BM mononuclear cells on fibronectin-coated slides.** Whole BM mononuclear cells were cultured for two weeks on fibronectin-coated chamber slides (Thermo Fisher Scientific Nunc Lab-Tek Chamber Slide System, Waltham, MA, USA) using complete  $\alpha$ MEM medium supplemented with 10% human AB serum without externally added growth factors. Immunofluorescence staining of paraformaldehyde-fixed cells demonstrating (B) numerous CD31<sup>bright</sup> cells closely interacting with (C) CD3<sup>+</sup> T cells. (A) Merge. Note the close contact of T cells with CD31<sup>bright</sup> cells (arrowheads), and the CD3<sup>+</sup> cells within a CD31<sup>bright</sup> cell (arrows). (A-C) Nuclei stained with DAPI. Collapsed 9,45  $\mu$ m-z-stack consisting of 21 consecutive images. Scale bars, 10  $\mu$ m. (D) Orthoview CLSM image of collapsed z-stack shown in (A) demonstrating that CD3<sup>+</sup> T cells are internalized within the CD31<sup>bright</sup> cell building a cell-in-cell structure.
